# Supplementary material for: Outcome Prediction, Quality of Life, and Life Expectancy in Metastatic Spine Tumors: WFNS Spine Committee Recommendation
Source: Research Square preprint supplement (doi:10.21203/rs.3.rs-4988455/v1), 2024-10-18
Supplement: Supplementary file 1 [file dabfb9c98c63648a1a2dcc84.docx]

**Table 6.** The EuroQoL 5 Dimensions Questionnaire

| **Mobility** |
| --- |
| I have no problems in walking  [Grab your reader’s attention with a great quote from the document or use this space to emphasize a key point. To place this text box anywhere on the page, just drag it.] |
| I have some problems in walking about  [Grab your reader’s attention with a great quote from the document or use this space to emphasize a key point. To place this text box anywhere on the page, just drag it.] |
| I am confined to bed  [Grab your reader’s attention with a great quote from the document or use this space to emphasize a key point. To place this text box anywhere on the page, just drag it.] |
| **Self-care** |
| I have no problems with self-care  [Grab your reader’s attention with a great quote from the document or use this space to emphasize a key point. To place this text box anywhere on the page, just drag it.] |
| I have some problems washing or dressing myself  [Grab your reader’s attention with a great quote from the document or use this space to emphasize a key point. To place this text box anywhere on the page, just drag it.] |
| I am unable to wash or dress myself  [Grab your reader’s attention with a great quote from the document or use this space to emphasize a key point. To place this text box anywhere on the page, just drag it.] |
| **Usual activities (e.g. Work, study, housework, family or leisure activities)** |
| I have no problem with performing my usual activities  [Grab your reader’s attention with a great quote from the document or use this space to emphasize a key point. To place this text box anywhere on the page, just drag it.] |
| I have some problems with performing my usual activities  [Grab your reader’s attention with a great quote from the document or use this space to emphasize a key point. To place this text box anywhere on the page, just drag it.] |
| I am unable to perform my usual activities  [Grab your reader’s attention with a great quote from the document or use this space to emphasize a key point. To place this text box anywhere on the page, just drag it.] |
| **Pain/ discomfort** |
| I have no pain or discomfort  [Grab your reader’s attention with a great quote from the document or use this space to emphasize a key point. To place this text box anywhere on the page, just drag it.] |
| I have some pain or discomfort  [Grab your reader’s attention with a great quote from the document or use this space to emphasize a key point. To place this text box anywhere on the page, just drag it.] |
| I have extreme pain or discomfort  [Grab your reader’s attention with a great quote from the document or use this space to emphasize a key point. To place this text box anywhere on the page, just drag it.] |
| **Anxiety/ Depression** |
| I am not anxious or depressed  [Grab your reader’s attention with a great quote from the document or use this space to emphasize a key point. To place this text box anywhere on the page, just drag it.] |
| I am moderately anxious or depressed  [Grab your reader’s attention with a great quote from the document or use this space to emphasize a key point. To place this text box anywhere on the page, just drag it.] |
| I am extremely anxious or depressed  [Grab your reader’s attention with a great quote from the document or use this space to emphasize a key point. To place this text box anywhere on the page, just drag it.] |
